# Supplementary material for: Preparation and characterization of a certified reference material of toxic elements in cannabis leaves
Source: Springer Nature journal article supplement (doi:10.1007/s00216-025-05809-z), 2025-03-12
Supplement: MOESM1 [file 216_2025_5809_MOESM1_ESM.pdf]

## Supplementary information S1 of

### Preparation and characterization of a Certified Reference Material of toxic elements in Cannabis leaves

Adriana Rodriguez<sup>1,2</sup>, Cristhian Paredes<sup>1</sup> and Elianna Castillo<sup>2,\*</sup>

<sup>1</sup> Grupo de Investigación en Metrología Química y Bioanálisis. Instituto Nacional de Metrología de Colombia, Ak. 50 No. 26-55 Int. 2, 111321 Bogotá, Colombia.

<sup>2</sup> Grupo de Estudios para la Remediación y Mitigación de Impactos Negativos al Ambiente. Universidad Nacional de Colombia, Ak. 30 No. 45-3, 111321 Bogotá, Colombia.

\* Corresponding author: [ecastillo@unal.edu.co](mailto:ecastillo@unal.edu.co)

**Table S1.** Instrumental linear ranges for measurement method based on ICP-MS.

| Analyte isotope/internal estándar | p-value of the lack of fit ANOVA | Instrumental linear range / $\mu\text{g kg}^{-1}$ |
|-----------------------------------|----------------------------------|---------------------------------------------------|
| As75 / Ge72                       | 0.53                             | 0.5 - 99.3                                        |
| Cd110 / Ge72                      | 0.28                             | 0.5 - 101.4                                       |
| Cd112 / Tl205                     | 0.20                             | 0.5 - 101.4                                       |
| Cd113 / In115                     | 0.08                             | 0.5 - 80.8                                        |
| Cd114 / In115                     | 0.12                             | 2.5 - 20.6                                        |
| Pb206 / Tl205                     | 0.14                             | 0.5 - 100.5                                       |
| Pb207 / Tl205                     | 0.31                             | 2.5 - 100.5                                       |
| Pb208 / Tl205                     | 0.18                             | 0.5 - 60.2                                        |

**Table S2.** Instrumental linear ranges for measurement method based on GF-AAS and HG-AAS

| Element | p-value of the lack of fit ANOVA | Instrumental linear range / $\mu\text{g kg}^{-1}$ |
|---------|----------------------------------|---------------------------------------------------|
| Pb      | 0.49                             | 2.9 – 30                                          |
| Cd      | 0.21                             | 1.5 - 4.5                                         |
| As      | 0.13                             | 1.0 – 15                                          |

**Table S3.** Relative error of the certified reference materials (CRM) used as quality controls in property value measurements

| Element | Technique | MRC                       | Relative error / % |
|---------|-----------|---------------------------|--------------------|
| As      | ICP-MS    | Green Tea Leaves SRM 3254 | 0,3                |
|         |           | Green Tea Leaves SRM 3254 | 2,6                |
|         | HG-AAS    | Green Tea Leaves SRM 3254 | -0,7               |
| Cd      | ICP-MS    | Kelp Powder SRM 3232      | -2,6               |
|         |           | Pine Needles SRM 1575a    | -3,9               |
|         | GF-AAS    | Pine Needles SRM 1575a    | -2,5               |
|         |           | Pine Needles SRM 1575a    | 1,9                |
| Pb      | ICP-MS    | Pine Needles SRM 1575a    | -1,2               |
|         |           | Apple Leaves SRM 1515     | -2,6               |
|         | GF-AAS    | Apple Leaves SRM 1515     | -0,88              |
|         |           | Kelp Powder SRM 3232      | 1,4                |
|         |           | Kelp Powder SRM 3232      | -1,4               |
